# Supplementary material
Source: PubMed Central journal article supplement (PMC4620527)
Supplement: Supp_Fig1.pdf [file Supp_Fig1.pdf]

## Supplementary Data

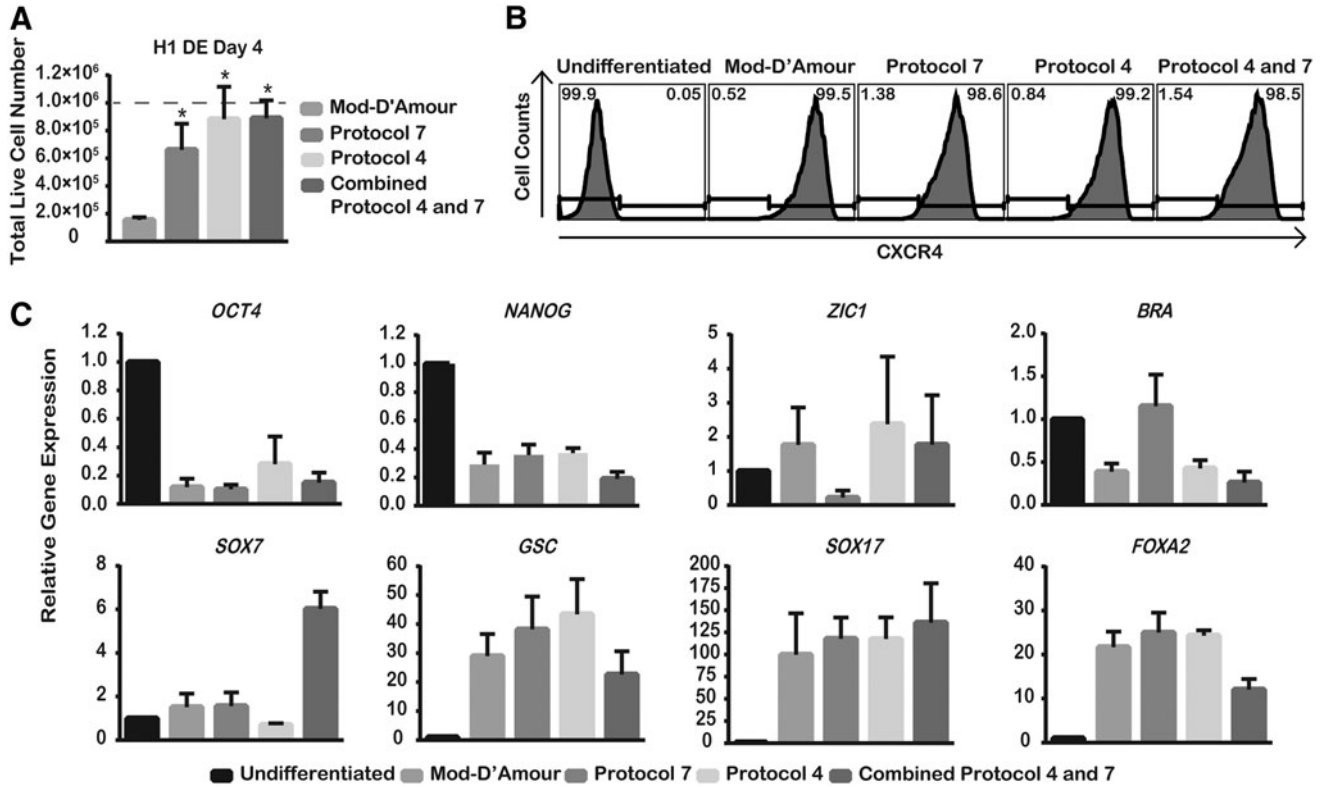

**SUPPLEMENTARY FIG. S1.** Modified protocols enhanced H1 human embryonic stem cell (hESC) definitive endoderm (DE) differentiation. **(A)** Total live cell numbers at the end of 4-day DE differentiation of H1 cells. Independent runs were normalized to  $1.0 \times 10^6$  starting undifferentiated cells (dotted line). \* $P < 0.05$  compared with the modified D'Amour (Mod-D'Amour) protocol by Student's unpaired  $t$ -test. **(B)** Representative flow cytometric histograms of CXCR4 induction after 4-day DE differentiation of H1 cells. **(C)** Gene expression of lineage-specific markers on day 4 of H1 cell DE differentiation. Data are presented as mean  $\pm$  standard error of the mean (SEM),  $n = 3-5$ .
