# Supplementary material
Source: PubMed Central journal article supplement (PMC4620527)
Supplement: Supp_Fig2.pdf [file Supp_Fig2.pdf]

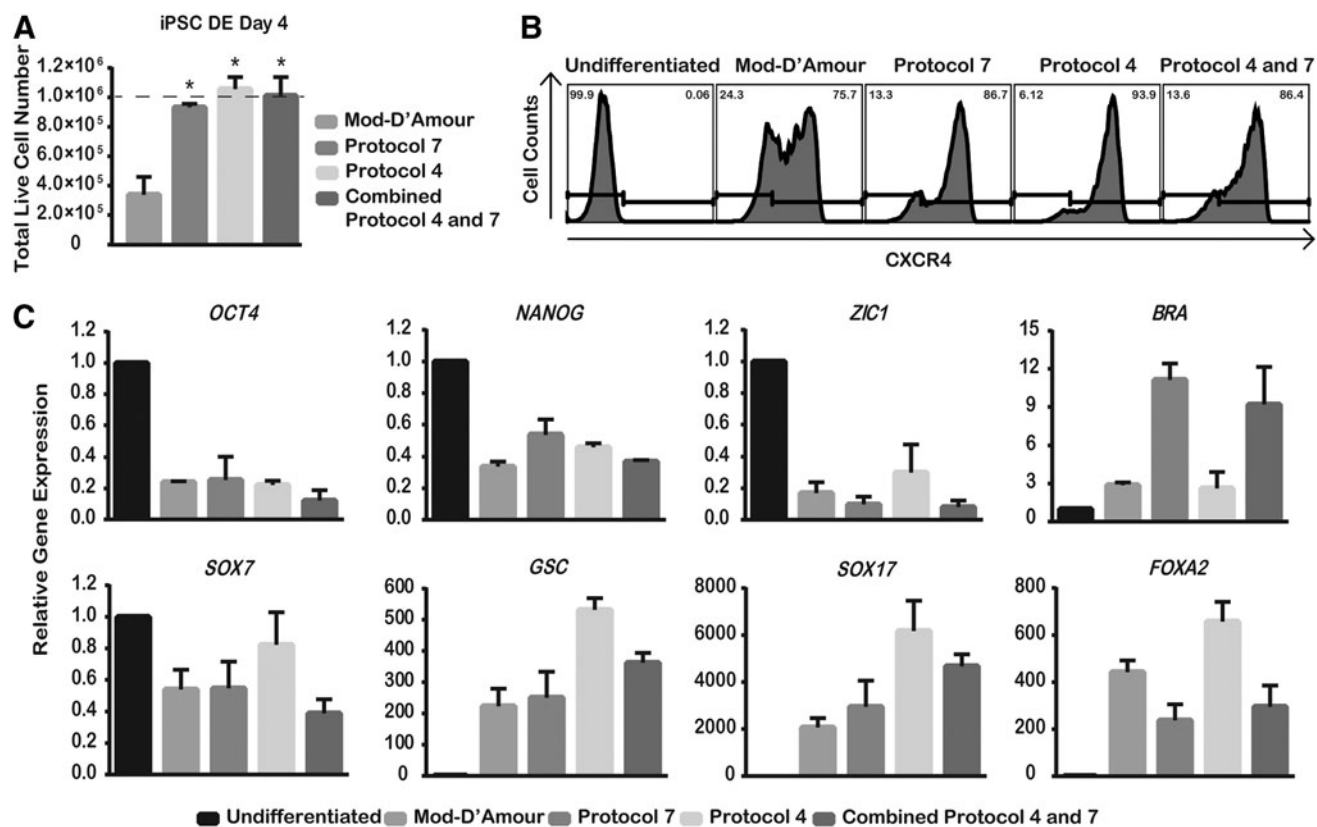

**SUPPLEMENTARY FIG. S2.** Modified protocols enhanced induced pluripotent stem cell (iPSC) DE differentiation. **(A)** Total live cell numbers at the end of 4-day DE differentiation of iPSCs. Independent runs were normalized to  $1.0 \times 10^6$  starting undifferentiated cells (*dotted line*).  $*P < 0.05$  compared with the Mod-D'Amour protocol by Student's unpaired *t*-test. **(B)** Representative flow cytometric histograms of CXCR4 induction after 4-day DE differentiation of iPSCs. **(C)** Gene expression of lineage-specific markers on day 4 of iPSC DE differentiation. Data are presented as mean  $\pm$  SEM,  $n = 3-5$ .
